# Supplementary material
Source: PubMed Central journal article supplement (PMC1352344)

VEGF R blockade Cigarette smoke

### Triggers of emphysema

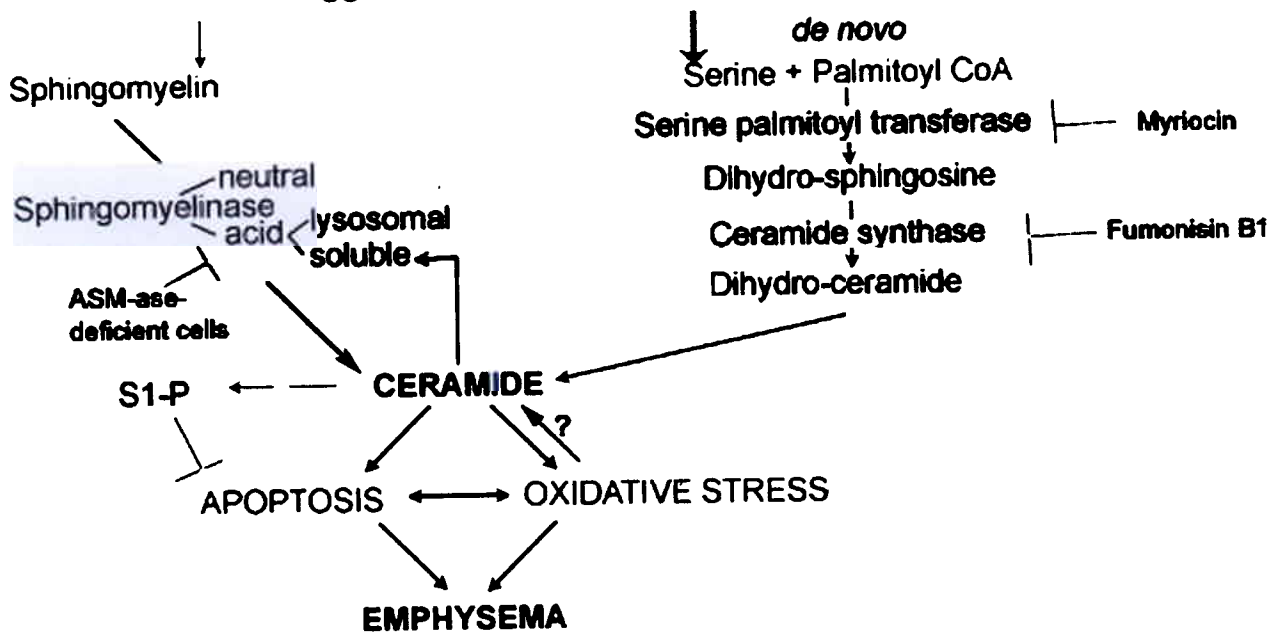

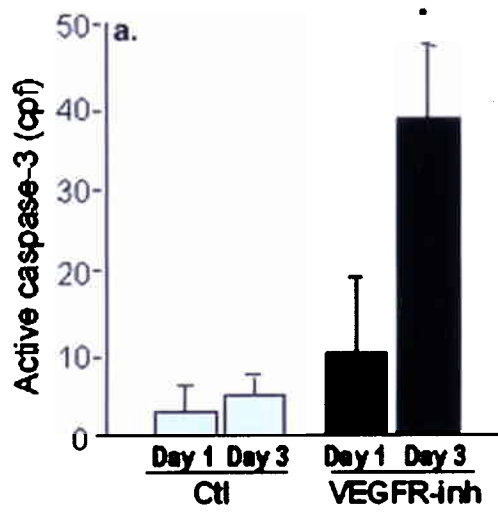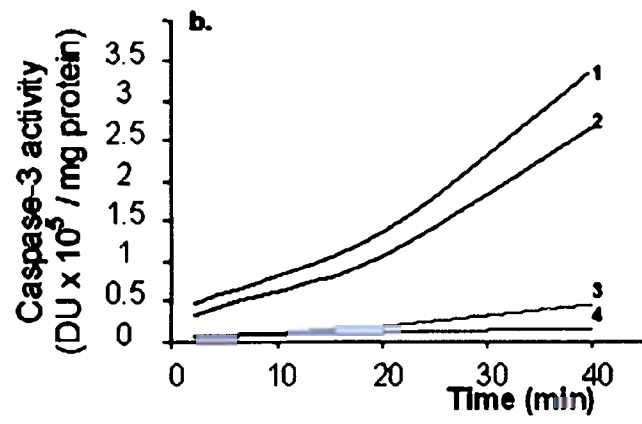

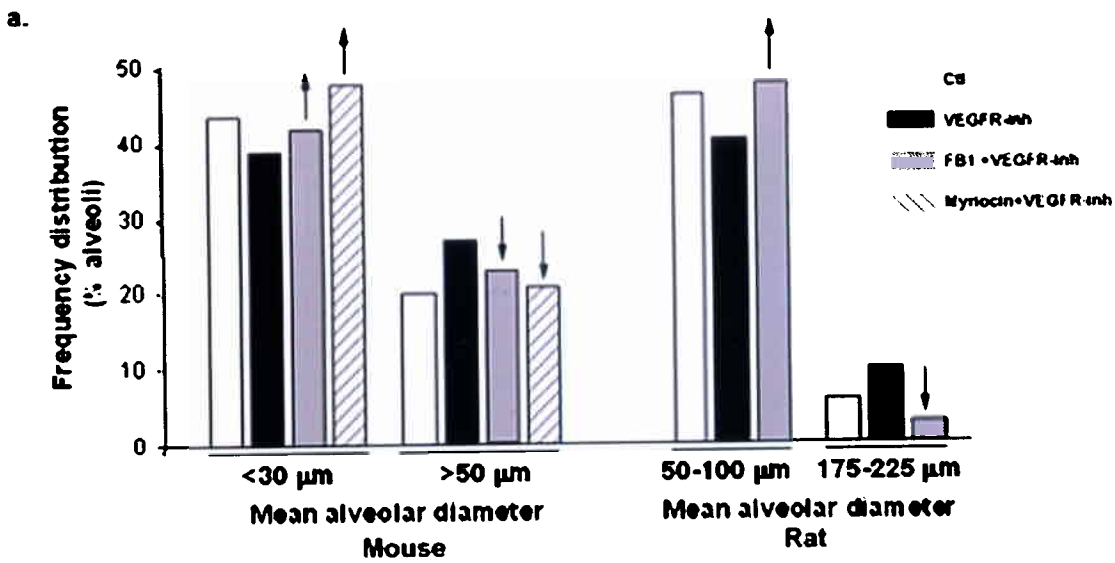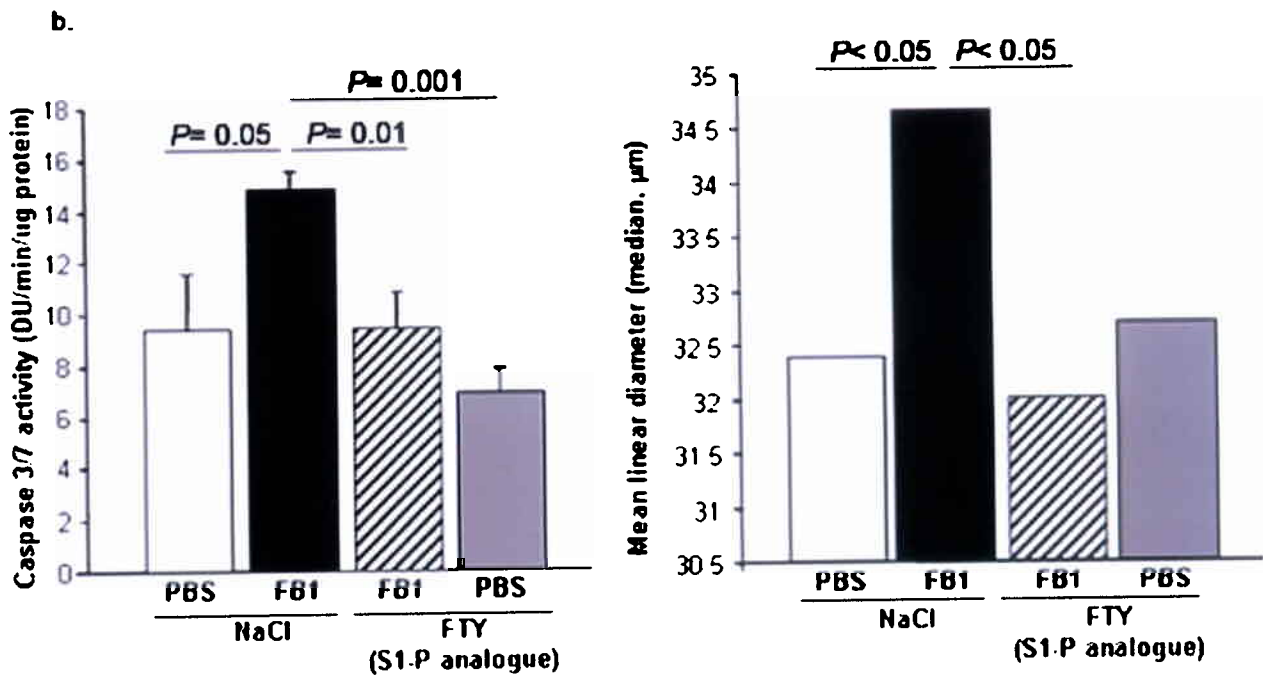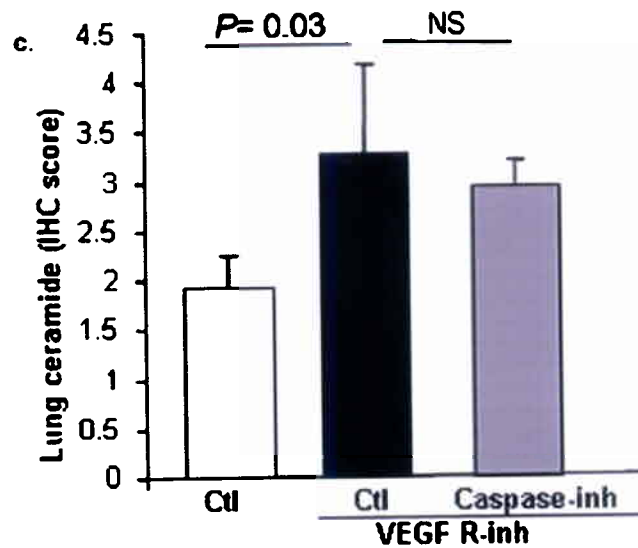

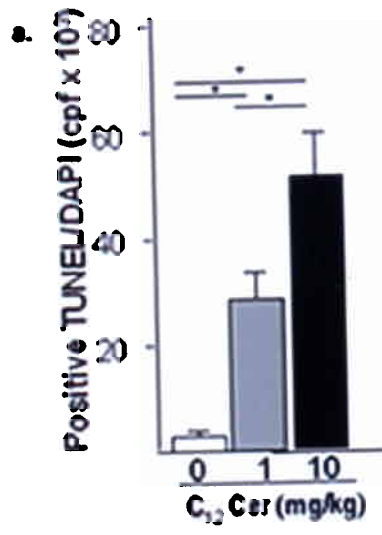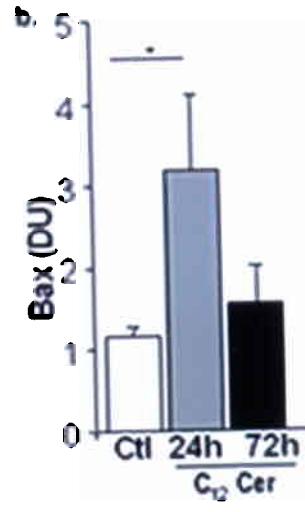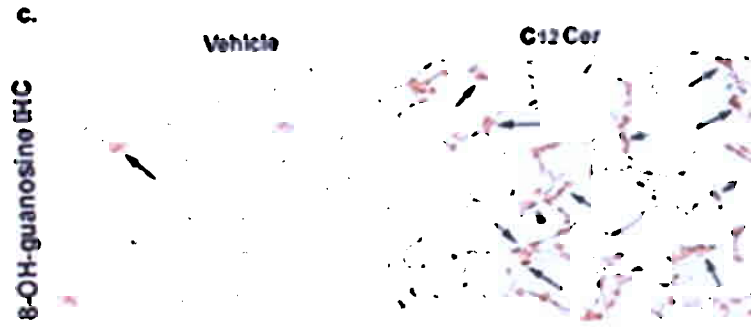

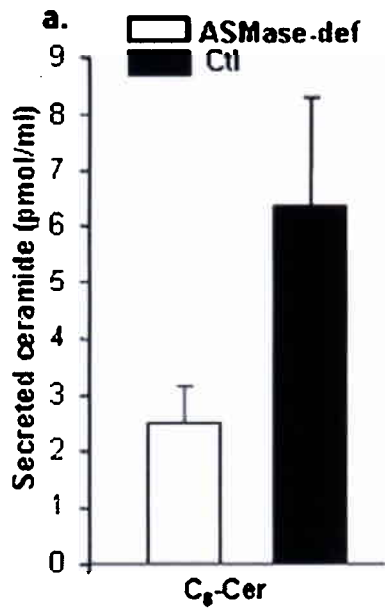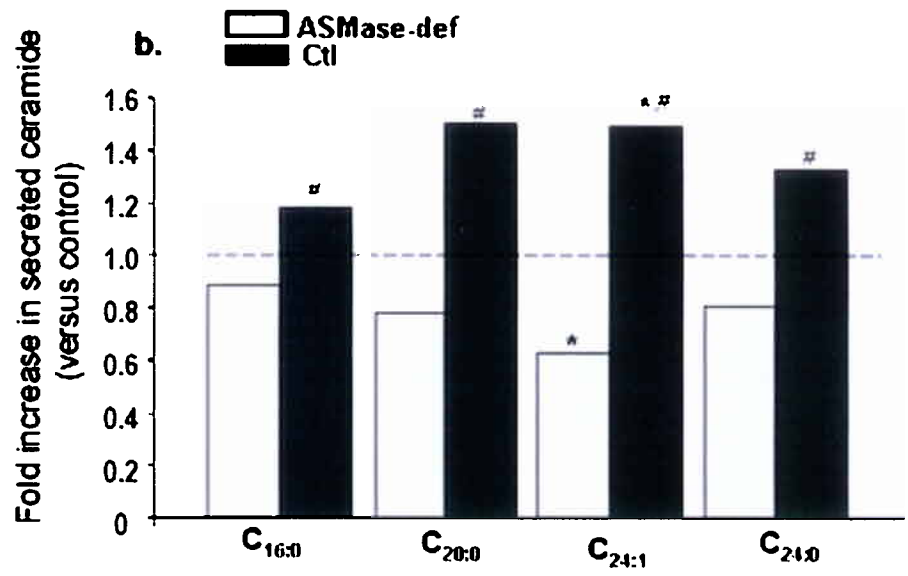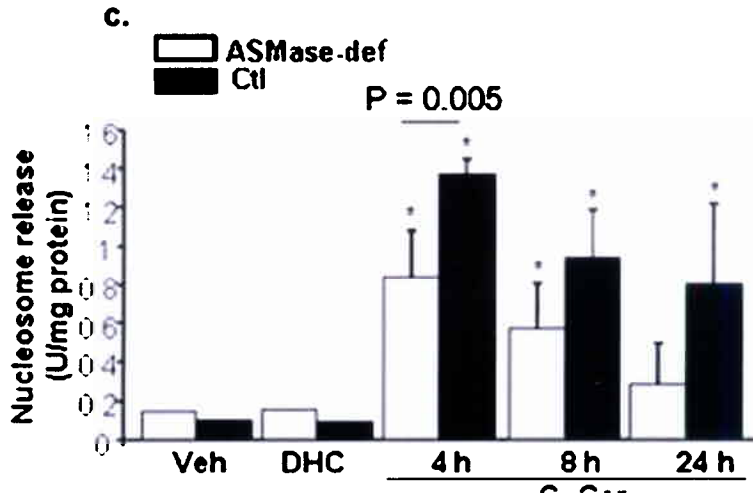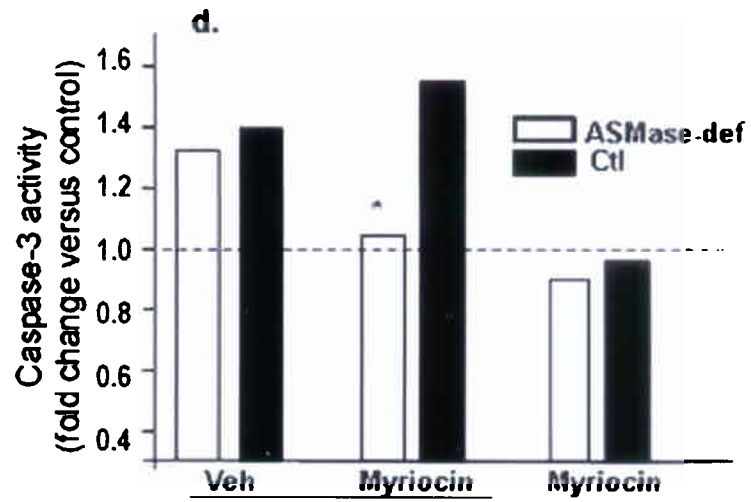

Supplement: NIHMS4881-supplement-sup1.pdf [file NIHMS4881-supplement-sup1.pdf]
